# Supplementary material
Source: publisher figshare collection journal article supplement (https://acs.figshare.com/ndownloader/files/25516113)
Supplement: Supplementary file 1 [file 25516113]

## Supporting Materials

### Molecular insight into the cosolvent effect on the lignin-cellulose adhesion.

<sup>a</sup>Sonia Milena AGUILERA-SEGURA, <sup>a</sup>Francesco DI RENZO\*, <sup>a</sup>Tzonka MINEVA\*

<sup>a</sup>ICGM, Univ Montpellier, CNRS, ENSCM, Montpellier, France

\* To whom correspondence should be addressed

Emails: Francesco.Di-Renzo@enscm.fr; tzonka.mineva@enscm.fr

## Content

|                                                                                                                                                                                                                                                                                                                                                                                   |   |
|-----------------------------------------------------------------------------------------------------------------------------------------------------------------------------------------------------------------------------------------------------------------------------------------------------------------------------------------------------------------------------------|---|
| Supporting Tables.....                                                                                                                                                                                                                                                                                                                                                            | 3 |
| <b>Table S1.</b> Configuration of simulated systems and equilibrium size of simulation boxes for lignin-cellulose complex studied in this work. The model consists of cellulose nanocrystal with 7 chains (8 glucose monomers per chain) and 4 lignin dimer.....                                                                                                                  | 3 |
| <b>Table S2.</b> Average Lennard-Jones (LJ), Coulomb (Coul) and total (Total) lignin-cellulose energies with total standard deviation errors. Values are normalised by the number of lignin dimers and presented in kJ/mol. The large error bars are due to the mobility of two among the four lignin dimers, uncoordinated to cellulose (see main text and Table S3). .....      | 3 |
| <b>Table S3.</b> Average lignin-cellulose intermolecular energies in kJ/mol between each lignin dimer labelled as L1, L2, L3 and L4, and the hydrophilic (chains AF) or hydrophobic (chains BDEG) surface chains of cellulose, as a function of the organic cosolvent fraction (Xcosol). The four lignin dimers and cellulose chains (AFBDEG) are shown in Fig. 2, main text..... | 4 |
| <b>Table S4.</b> Average block analysis of the torsion angle $\omega$ (O5-C5-C6-O6) in cellulose chains.....                                                                                                                                                                                                                                                                      | 4 |
| <b>Table S5.</b> Average block analysis for RMSD of the positions of atoms in cellulose hydroxymethyl groups.....                                                                                                                                                                                                                                                                 | 4 |
| <b>Table S6.</b> H-bond lifetimes for the cellulose-water (C-W) and cellulose-cosolvent (C-Cosol), interaction types, obtained from the H-bond autocorrelation functions of each H-bond type, for the hydrophobic (chains BDEG) and the hydrophilic (chains AF) cellulose surfaces, respectively.                                                                                 | 5 |
| Supporting Figures .....                                                                                                                                                                                                                                                                                                                                                          | 6 |
| <b>Figure S1.</b> Lennard-Jones (LJ, black) and Coulomb (Coul, red) average lignin-cellulose energies along the 20-ns MD normalised by the number of lignin dimers in water, ethanol (EtOH) and                                                                                                                                                                                   |   |

|                                                                                                                                                                                                                                                                                                                                                                                                                                                 |    |
|-------------------------------------------------------------------------------------------------------------------------------------------------------------------------------------------------------------------------------------------------------------------------------------------------------------------------------------------------------------------------------------------------------------------------------------------------|----|
| acetonitrile (ACN) pure solvents and the respective water-organic (EtOH and ACN) binary mixtures .....                                                                                                                                                                                                                                                                                                                                          | 6  |
| <b>Figure S3.</b> $O_{\text{cellulose}}-O_{\text{lignin}}$ radial distribution functions in water-organic solvents at 50 and 75 wt% concentration of the organic compound, and in their mono-component counterparts.....                                                                                                                                                                                                                        | 7  |
| <b>Figure S4.</b> $O_{\text{cellulose}}-O_{\text{Me}_{\text{lignin}}}$ radial distribution functions in water-organic solvents at 50 and 75% concentration of the organic compound, and in their mono-component counterparts.....                                                                                                                                                                                                               | 7  |
| <b>Figure S5.</b> $O_{\text{cellulose}}-O_{\text{water}}$ (A) and $O_{\text{cellulose}}-O_{\text{EtOH}}$ (B) <i>grs</i> in water-ethanol (EtOH) mixtures.....                                                                                                                                                                                                                                                                                   | 8  |
| <b>Figure S7.</b> $O_{\text{lignin}}-O_{\text{water}}$ , $O_{\text{lignin}}-O_{\text{EtOH}}$ , $O_{\text{lignin}}-N_{\text{ACN}}$ radial distribution functions, <i>gr</i> , in (A) water-ethanol (EtOH) and (B) water-acetonitrile (ACN) mixtures.....                                                                                                                                                                                         | 9  |
| <b>Figure S8.</b> $O_{\text{cellulose}}-C_{\text{EtOH} / \text{ACN}}$ radial distribution functions, <i>gr</i> , between the cellulose oxygens in hydrophilic and hydrophobic surfaces, and methyl carbons of the (A, B) ethanol (EtOH) and (C, D) acetonitrile (ACN) in 100 wt% organic solvents. ....                                                                                                                                         | 10 |
| <b>Figure S9.</b> Interaction energies between water and cellulose (wat-CELL), and water and lignin (wat-LIG) (left pannel), and between ethanol and cellulose (EtOH-CELL), and ethanol and lignin (EtOH-LIG) (right panel). The interaction energies are decomposed in Lennard-Jones (LJ) and Coulomb (Coul) energies and are normalized by number of glucose or lignin monomers, as function of EtOH content ( $X_{\text{EtOH}}$ ).....       | 11 |
| <b>Figure S10.</b> Interaction energies between water and cellulose (wat-CELL), and water and lignin (wat-LIG) (left panel), and between acetonitrile and cellulose (ACN-CELL), and acetonitrile and lignin (ACN-LIG) (right panel). The interaction energies are decomposed in Lennard-Jones (LJ) and Coulomb (Coul) energies and are normalized by number of glucose or lignin monomers, as function of ACN content ( $X_{\text{ACN}}$ )..... | 11 |

## Supporting Tables

**Table S1.** Configuration of simulated systems and equilibrium size of simulation boxes for lignin-cellulose complex studied in this work. The model consists of cellulose nanocrystal with 7 chains (8 glucose monomers per chain) and 4 lignin dimer.

| Solvent system     | Organic solvent fraction (wt%) | Number of organic solvent molecules | Number of water molecules | Cubic box side length (nm) |
|--------------------|--------------------------------|-------------------------------------|---------------------------|----------------------------|
| pure water         | 0                              | 0                                   | 10370                     | 6.886                      |
| ethanol-water      | 50                             | 1725                                | 4415                      | 6.749                      |
|                    | 75                             | 2443                                | 2084                      | 6.749                      |
| acetonitrile-water | 50                             | 1760                                | 4013                      | 6.615                      |
|                    | 75                             | 2639                                | 2006                      | 6.746                      |
| pure ethanol       | 100                            | 2985                                | 0                         | 6.711                      |
| pure acetonitrile  | 100                            | 3442                                | 0                         | 6.813                      |

**Table S2.** Average Lennard-Jones (LJ), Coulomb (Coul) and total (Total) lignin-cellulose energies with total standard deviation errors. Values are normalised by the number of lignin dimers and presented in kJ/mol. The large error bars are due to the mobility of two among the four lignin dimers, uncoordinated to cellulose (see main text and Table S3).

| Solvent              | Average Energies and standard deviation errors |   |      |       |   |      |        |   |      |
|----------------------|------------------------------------------------|---|------|-------|---|------|--------|---|------|
|                      | LJ                                             |   |      | Coul  |   |      | Total  |   |      |
| 100 wt% Water        | -17.0                                          | ± | 6.5  | -11.2 | ± | 5.5  | -28.2  | ± | 8.3  |
| 50 wt% Ethanol       | -9.0                                           | ± | 5.8  | -4.8  | ± | 4.8  | -13.8  | ± | 9.3  |
| 75 wt% Ethanol       | -6.7                                           | ± | 7.5  | -4.7  | ± | 6.6  | -11.4  | ± | 13.0 |
| 100 wt% Ethanol      | -13.7                                          | ± | 11.6 | -10.9 | ± | 10.7 | -24.6  | ± | 21.3 |
| 50 wt% Acetonitrile  | -5.2                                           | ± | 7.1  | -3.0  | ± | 5.0  | -8.2   | ± | 11.2 |
| 75 wt% Acetonitrile  | -5.5                                           | ± | 7.1  | -6.1  | ± | 9.1  | -11.6  | ± | 15.1 |
| 100 wt% Acetonitrile | -6.1                                           | ± | 6.9  | -7.4  | ± | 8.2  | -13.5  | ± | 13.6 |
| No Solvent           | -65.1                                          | ± | 4.0  | -86.1 | ± | 8.5  | -151.2 | ± | 9.4  |

**Table S3.** Average lignin-cellulose intermolecular energies in kJ/mol between each lignin dimer labelled as L1, L2, L3 and L4, and the hydrophilic (chains AF) or hydrophobic (chains BDEG) surface chains of cellulose, as a function of the organic cosolvent fraction (Xcosol). The four lignin dimers and cellulose chains (AFBDEG) are shown in Fig. 2, main text.

| Solvent     |    | No Solvent   | Water       | Ethanol     |              |              | Acetonitrile |             |             |
|-------------|----|--------------|-------------|-------------|--------------|--------------|--------------|-------------|-------------|
| Xcosol      |    | -            | 0           | 0.50        | 0.75         | 1            | 0.50         | 0.75        | 1           |
| Hydrophilic | L1 | -132.0 ± 1.9 | -1.6 ± 1.0  | -3.9 ± 2.0  | -6.5 ± 4.3   | -13.0 ± 4.9  | -2.5 ± 1.2   | -4.2 ± 2.8  | -0.5 ± 0.3  |
|             | L2 | -7.6 ± 0.1   | -1.1 ± 0.2  | -1.0 ± 0.8  | -0.4 ± 0.2   | -0.9 ± 0.2   | -0.2 ± 0.2   | -0.3 ± 0.3  | -12.8 ± 6.3 |
|             | L3 | -61.5 ± 3.8  | -3.9 ± 1.5  | -4.0 ± 1.9  | -1.6 ± 1.2   | -0.1 ± 0.1   | -1.2 ± 0.6   | -6.9 ± 3.9  | -2.4 ± 1.5  |
|             | L4 | -4.4 ± 0.2   | -1.6 ± 0.8  | -1.8 ± 0.9  | 0.0 ± 0.0    | -1.0 ± 0.1   | -2.2 ± 1.1   | -15.7 ± 5.9 | -8.1 ± 4.4  |
| Hydrophobic | L1 | -42.0 ± 0.2  | -1.0 ± 0.7  | -2.6 ± 1.8  | -2.6 ± 1.2   | -1.8 ± 0.8   | -2.1 ± 1.0   | -1.5 ± 1.1  | -3.7 ± 2.8  |
|             | L2 | -137.5 ± 1.3 | -75.7 ± 9.1 | -2.7 ± 2.1  | -31.0 ± 12.0 | -32.5 ± 13.2 | -5.9 ± 4.2   | -5.8 ± 3.5  | -17.4 ± 6.2 |
|             | L3 | -92.5 ± 8.4  | -4.6 ± 1.8  | -12.6 ± 8.7 | 0.0 ± 0.0    | -0.1 ± 0.1   | -5.5 ± 3.8   | -4.2 ± 1.6  | -0.5 ± 0.3  |
|             | L4 | -127.4 ± 2.0 | -23.2 ± 9.5 | -26.6 ± 7.9 | -3.3 ± 2.4   | -48.9 ± 14.3 | -13.1 ± 4.0  | -7.7 ± 3.0  | -8.7 ± 4.6  |

**Table S4.** Average block analysis of the torsion angle  $\omega$  (O5-C5-C6-O6) in cellulose chains.

| Solvent      |      | Time Interval (ns) |         |         |         |
|--------------|------|--------------------|---------|---------|---------|
| Xcosol       |      | 5-10               | 10-15   | 15-20   | 5-20    |
| Water        | 0    | 57 ± 10            | 50 ± 8  | 53 ± 7  | 53 ± 9  |
|              | 0.50 | 84 ± 8             | 65 ± 11 | 64 ± 9  | 71 ± 13 |
|              | 0.75 | 72 ± 11            | 58 ± 9  | 61 ± 8  | 64 ± 11 |
| Ethanol      | 1    | 75 ± 10            | 68 ± 8  | 79 ± 10 | 74 ± 10 |
|              | 0.50 | 78 ± 8             | 79 ± 8  | 72 ± 10 | 76 ± 9  |
|              | 0.75 | 43 ± 10            | 43 ± 8  | 45 ± 7  | 44 ± 9  |
| Acetonitrile | 1    | 85 ± 11            | 79 ± 10 | 80 ± 11 | 82 ± 11 |

**Table S5.** Average block analysis for RMSD of the positions of atoms in cellulose hydroxymethyl groups

| Solvent      |      | Time Interval (ns) |             |             |             |             |
|--------------|------|--------------------|-------------|-------------|-------------|-------------|
| Xcosol       |      | 0-5                | 5-10        | 10-15       | 15-20       | 5-20        |
| Water        | 0    | 0.19 ± 0.03        | 0.23 ± 0.02 | 0.24 ± 0.02 | 0.24 ± 0.02 | 0.23 ± 0.02 |
|              | 0.50 | 0.20 ± 0.03        | 0.21 ± 0.02 | 0.23 ± 0.02 | 0.24 ± 0.02 | 0.23 ± 0.02 |
|              | 0.75 | 0.19 ± 0.02        | 0.23 ± 0.02 | 0.23 ± 0.02 | 0.25 ± 0.02 | 0.23 ± 0.02 |
| Ethanol      | 1    | 0.21 ± 0.03        | 0.21 ± 0.02 | 0.22 ± 0.02 | 0.23 ± 0.02 | 0.22 ± 0.02 |
|              | 0.50 | 0.20 ± 0.03        | 0.24 ± 0.03 | 0.24 ± 0.03 | 0.22 ± 0.02 | 0.23 ± 0.03 |
|              | 0.75 | 0.18 ± 0.04        | 0.30 ± 0.02 | 0.29 ± 0.03 | 0.25 ± 0.02 | 0.28 ± 0.03 |
| Acetonitrile | 1    | 0.18 ± 0.03        | 0.20 ± 0.02 | 0.21 ± 0.02 | 0.22 ± 0.02 | 0.21 ± 0.02 |

**Table S6.** H-bond lifetimes for the cellulose-water (C-W) and cellulose-cosolvent (C-Cosol), interaction types, obtained from the H-bond autocorrelation functions of each H-bond type, for the hydrophobic (chains BDEG) and the hydrophilic (chains AF) cellulose surfaces, respectively.

|                 | HB lifetimes (ps) |         |             |         |             |         |             |         |
|-----------------|-------------------|---------|-------------|---------|-------------|---------|-------------|---------|
| Solvent mixture | Water-EtOH        |         |             |         | Water-ACN   |         |             |         |
|                 | Hydrophilic       |         | Hydrophobic |         | Hydrophilic |         | Hydrophobic |         |
| $X_{cosol}$     | C-W               | C-Cosol | C-W         | C-Cosol | C-W         | C-Cosol | C-W         | C-Cosol |
| 0               | 9.8               | -       | 12.3        | -       | 9.8         | -       | 12.3        | -       |
| 0.25            | 18.6              | 21.5    | 23.6        | 34.5    | 17.6        | 9.7     | 22.6        | 28.6    |
| 0.50            | 32.2              | 30.3    | 32.6        | 30.3    | 20.3        | 9.9     | 30.7        | 22.1    |
| 0.75            | 49.0              | 44.0    | 57.9        | 57.4    | 20.7        | 10.4    | 24.7        | 27.2    |
| 1               | -                 | 43.8    | -           | 94.5    | -           | 12.0    | -           | 41.7    |

## Supporting Figures

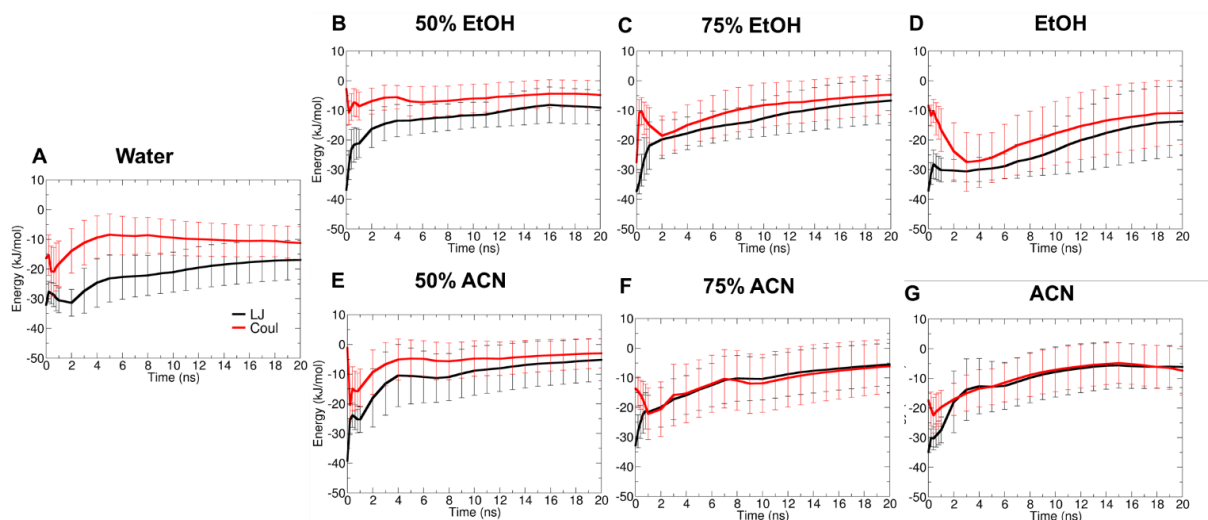

**Figure S1.** Lennard-Jones (LJ, black) and Coulomb (Coul, red) average lignin-cellulose energies along the 20-ns MD normalised by the number of lignin dimers in water, ethanol (EtOH) and acetonitrile (ACN) pure solvents and the respective water-organic (EtOH and ACN) binary mixtures

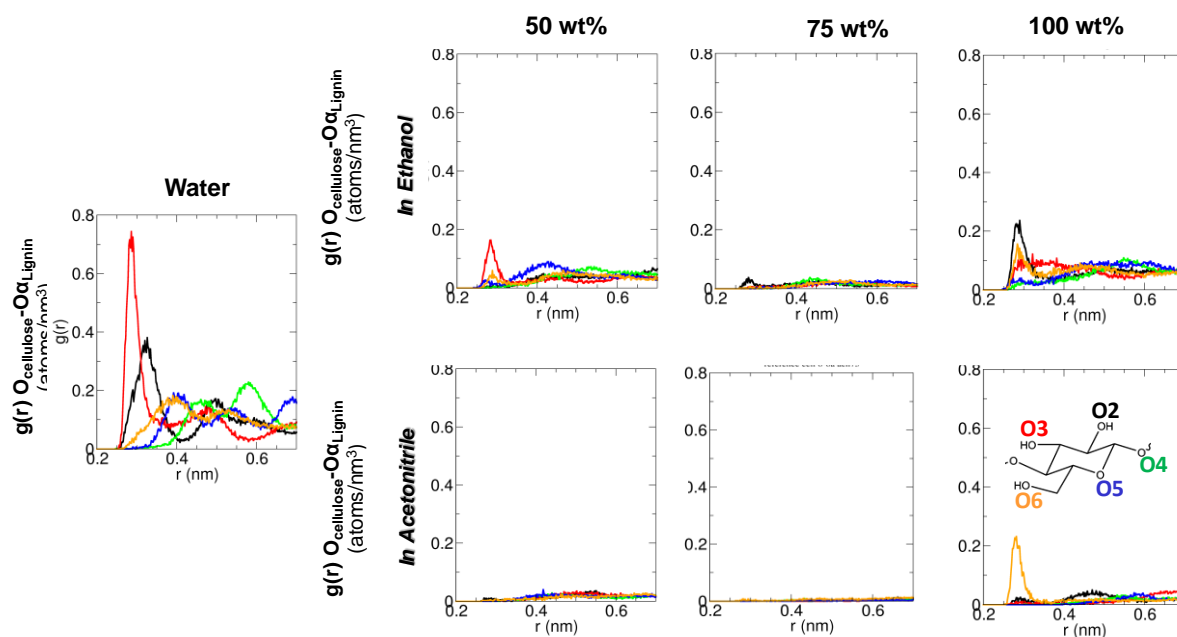

**Figure S2.**  $O_{\text{cellulose}}-O_{\alpha\text{lignin}}$  radial distribution functions in water-organic solvents at 50 and 75 wt% concentration of the organic compound, and in their mono-component counterparts for direct comparison.

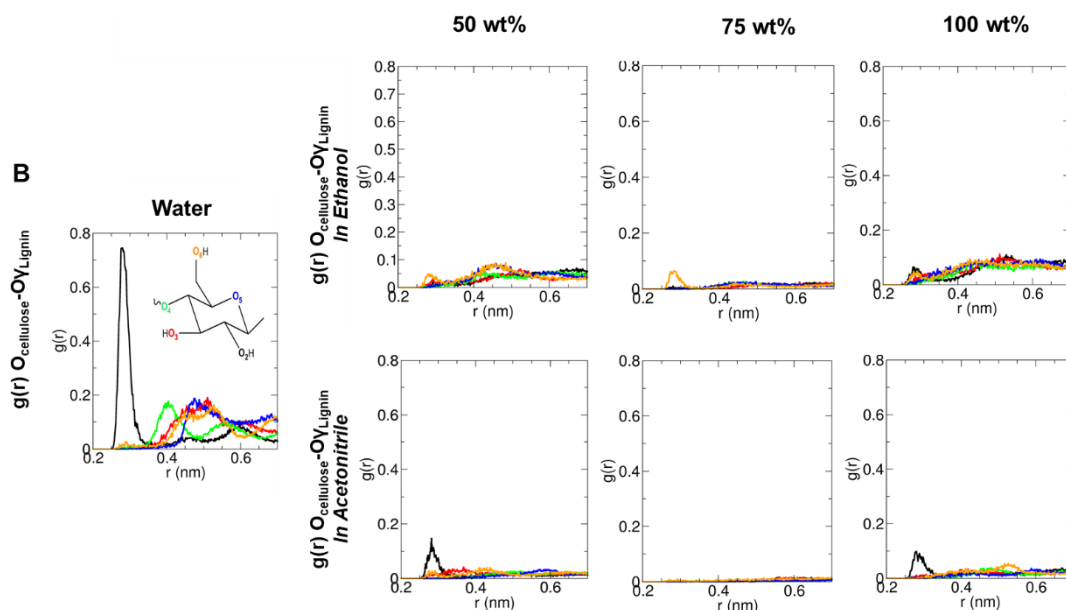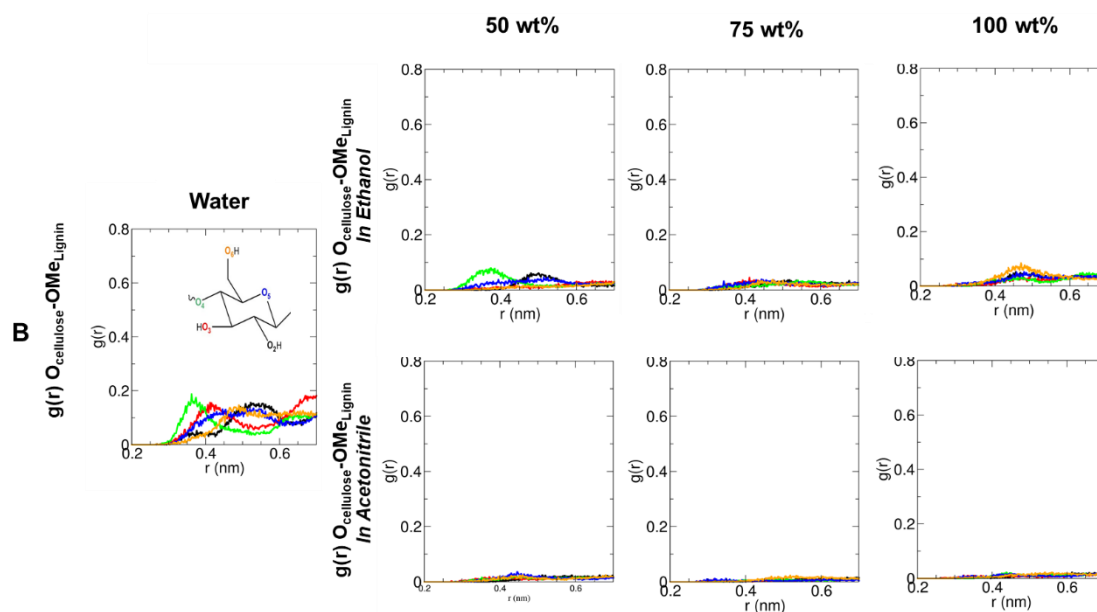

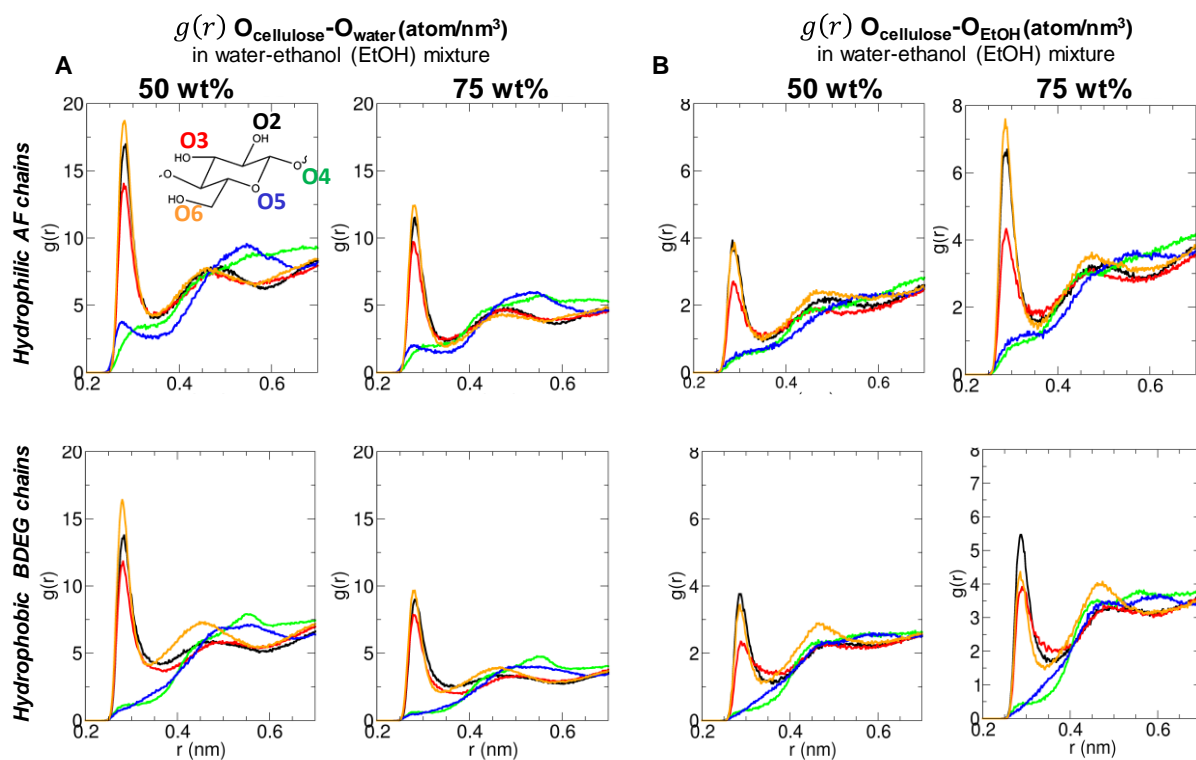

**Figure S5.**  $O_{\text{cellulose}}-O_{\text{water}}$  (A) and  $O_{\text{cellulose}}-O_{\text{EtOH}}$  (B)  $g(r)$ s in water-ethanol (EtOH) mixtures

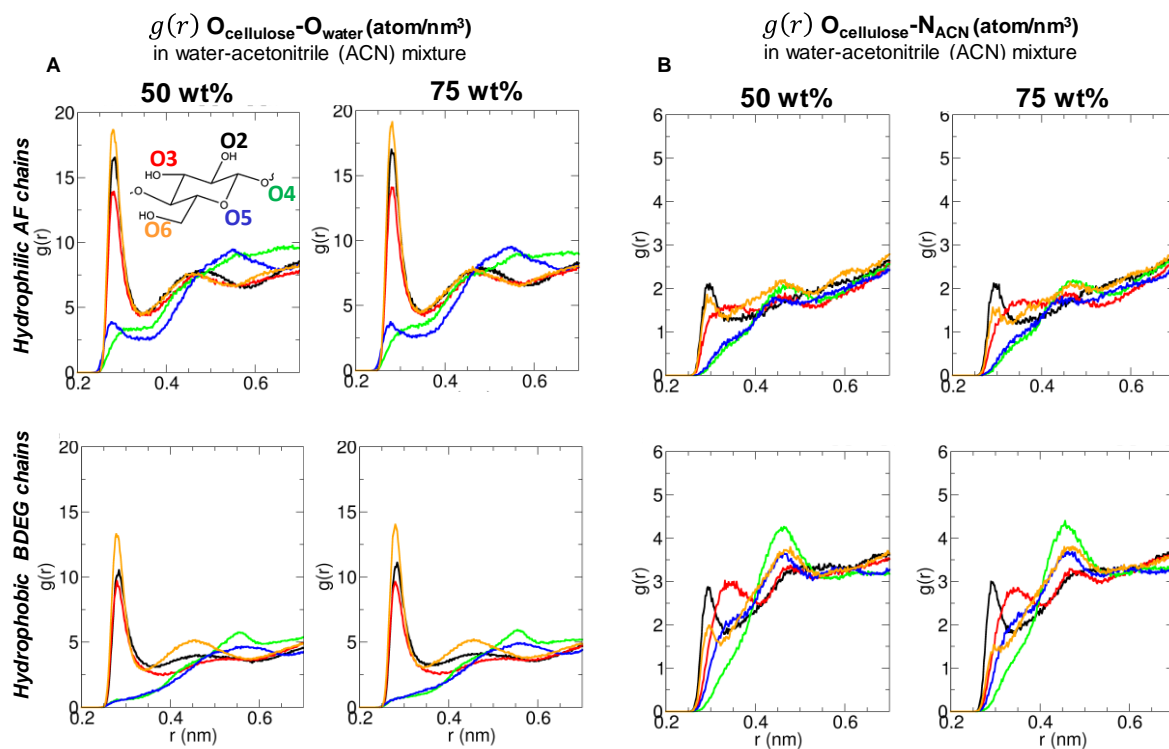

**Figure S6.**  $O_{\text{cellulose}}-O_{\text{water}}$  (A) and  $O_{\text{cellulose}}-N_{\text{ACN}}$  (B)  $g(r)$ s in water- acetonitrile (ACN) mixtures



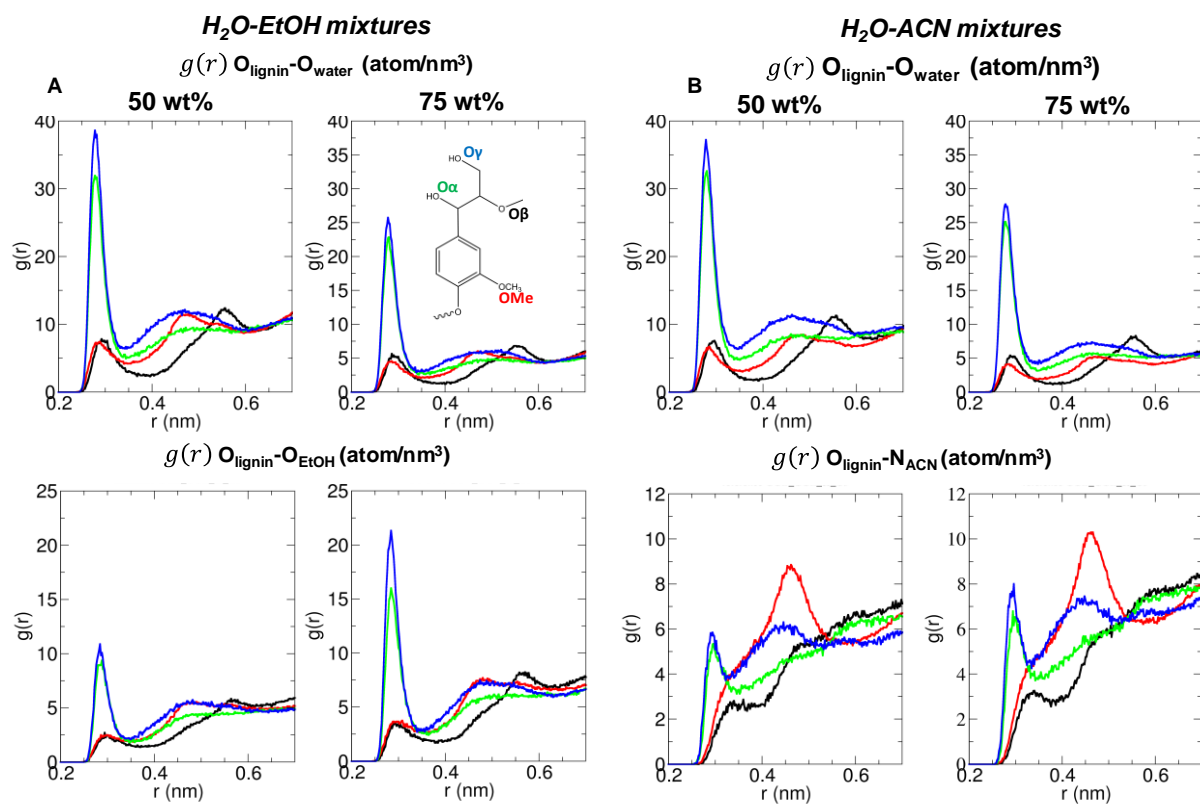

**Figure S7.**  $O_{\text{lignin}}-O_{\text{water}}$ ,  $O_{\text{lignin}}-O_{\text{EtOH}}$ ,  $O_{\text{lignin}}-N_{\text{ACN}}$  radial distribution functions,  $g(r)$ , in (A) water-ethanol (EtOH) and (B) water-acetonitrile (ACN) mixtures.

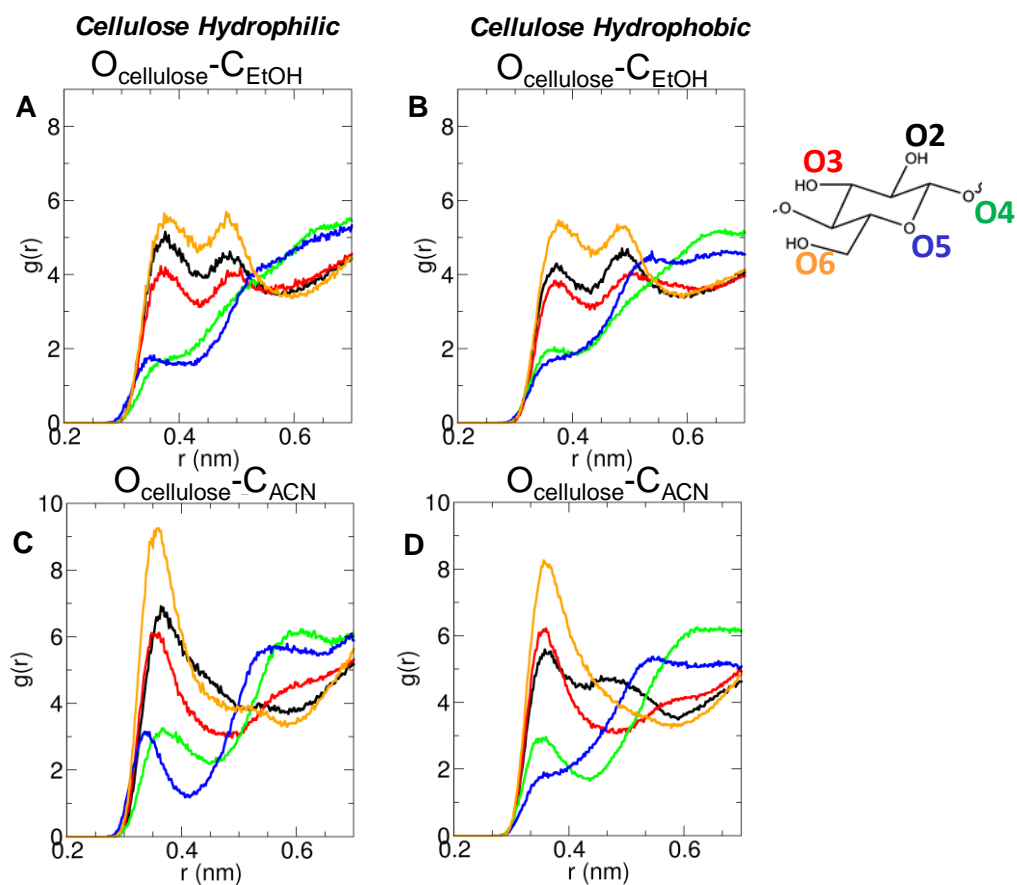

**Figure S8.**  $O_{\text{cellulose}}-C_{\text{EtOH / ACN}}$  radial distribution functions,  $g(r)$ , between the cellulose oxygens in hydrophilic and hydrophobic surfaces, and methyl carbons of the (A, B) ethanol (EtOH) and (C, D) acetonitrile (ACN) in 100 wt% organic solvents.

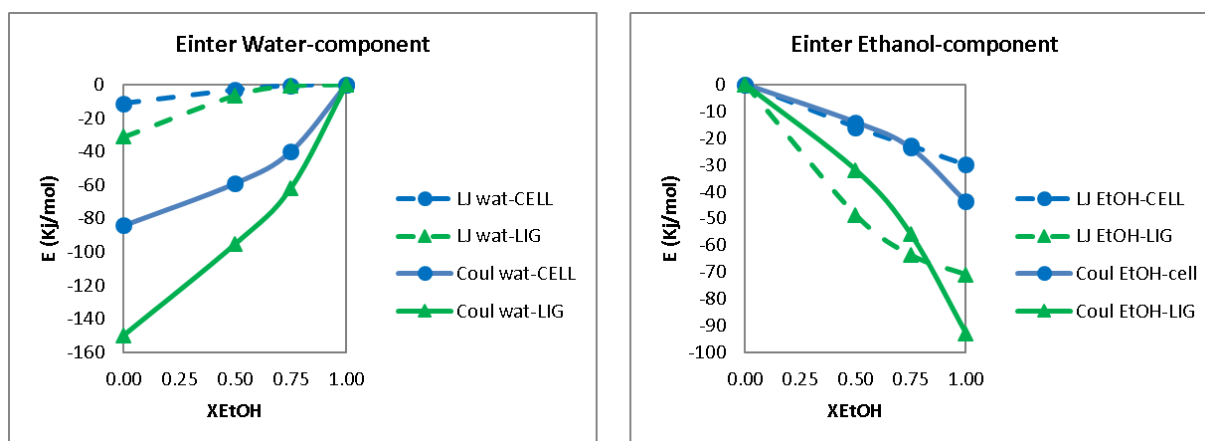

**Figure S9.** Interaction energies between water and cellulose (wat-CELL), and water and lignin (wat-LIG) (left pannel), and between ethanol and cellulose (EtOH-CELL), and ethanol and lignin (EtOH-LIG) (right panel). The interaction energies are decomposed in Lennard-Jones (LJ) and Coulomb (Coul) energies and are normalized by number of glucose or lignin monomers, as function of EtOH content ( $X_{\text{EtOH}}$ )

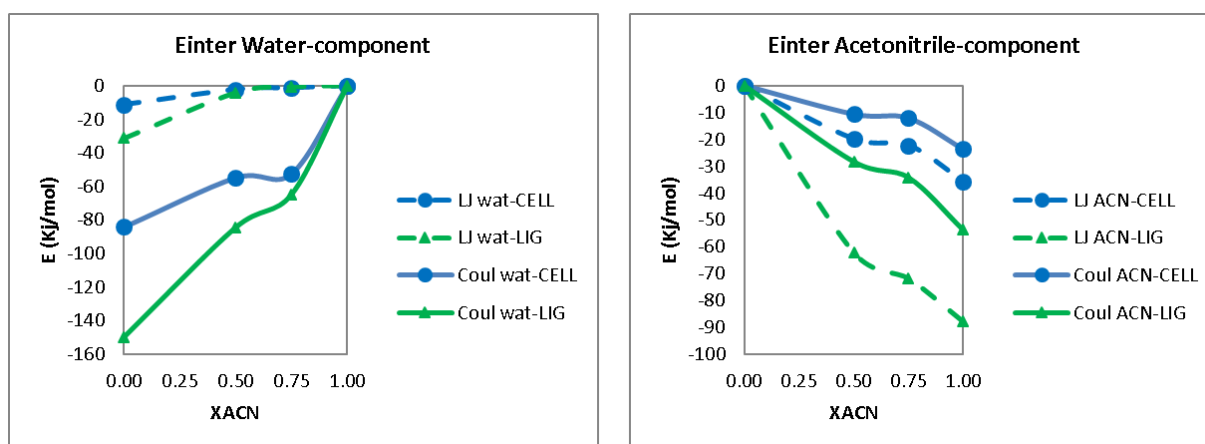

**Figure S10.** Interaction energies between water and cellulose (wat-CELL), and water and lignin (wat-LIG) (left panel), and between acetonitrile and cellulose (ACN-CELL), and acetonitrile and lignin (ACN-LIG) (right panel). The interaction energies are decomposed in Lennard-Jones (LJ) and Coulomb (Coul) energies and are normalized by number of glucose or lignin monomers, as function of ACN content ( $X_{\text{ACN}}$ )
